# Supplementary material
Source: publisher figshare collection journal article supplement (https://frontiersin.figshare.com/ndownloader/files/12981776)
Supplement: Supplementary file 1 [file 12981776]

# SUPPLEMENTARY MATERIAL

This supplement presents additional information on methods, figures, and tables that provide added data and clarification. Analysis code and data can be found at the public repository: [osf.io/4s9ty](https://osf.io/4s9ty)

DOI 10.17605/OSF.IO/4S9TY

**Table S1. Quantile summary for main text Figure 1A of CSIA-AA estimated trophic position by location and species.** Raw data from which distributions were drawn is available in the public repository.

| location       | spp  | upper IQR*1.5 | 75%   | median | mean  | 25%   | lower IQR*1.5 |
|----------------|------|---------------|-------|--------|-------|-------|---------------|
| American Samoa | SOTE | 4.622         | 4.197 | 3.977  | 4.054 | 3.914 | 3.489         |
| American Samoa | BRNO | 4.440         | 4.084 | 4.031  | 3.991 | 3.847 | 3.491         |
| Hawaii         | SOTE | 4.165         | 3.860 | 3.725  | 3.793 | 3.656 | 3.351         |
| Hawaii         | BRNO | 4.002         | 3.732 | 3.630  | 3.642 | 3.552 | 3.282         |
| Florida        | SOTE | 3.941         | 3.680 | 3.566  | 3.606 | 3.506 | 3.245         |
| Florida        | BRNO | 3.916         | 3.678 | 3.613  | 3.600 | 3.519 | 3.281         |

## A. time series of SST at sample locations

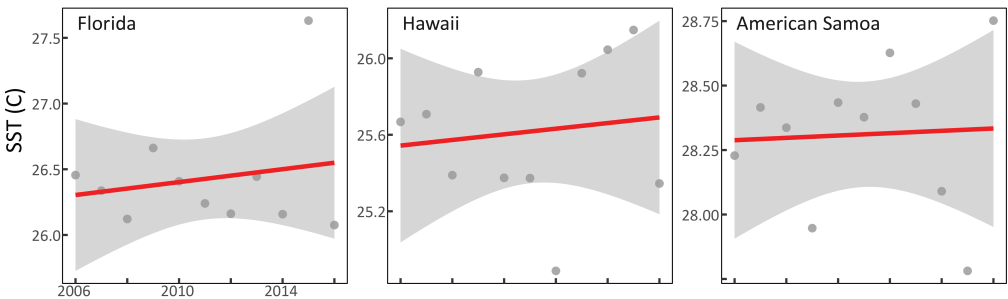

## B. regional polygons of SST

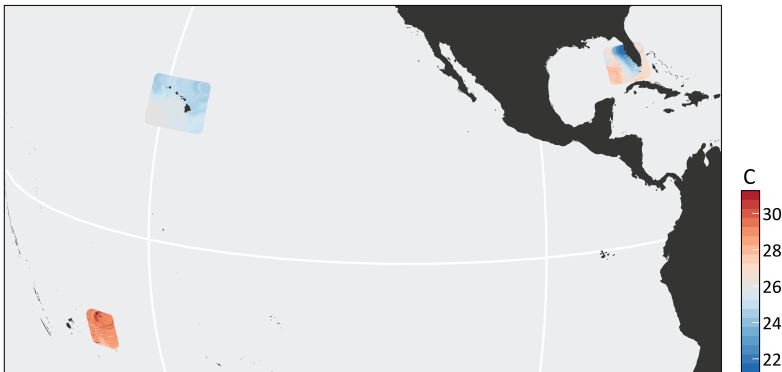

**Figure S1. SST time series (A) and map regions (B) from which the 10-year rate of change was approximated with linear model fits of the annual median.** Rates of change was calculated with sea surface temperature using the slope coefficient of a linear model on AVHRR SST data (POES 0.1°, 14-day composite, annual median) during the period 2006-2016.
